# Supplementary material for: Effects of Traditional Orchard Abandonment and Landscape Context on the Beneficial Arthropod Community in a Mediterranean Agroecosystem
Source: MDPI journal article supplement (doi:10.3390/insects14030277), 2023-03-10
Supplement: s1 [file s1]

**Table S1.** Complete results of the different models for the richness and abundance of spiders, parasitoids, and bees. Estimates, standard errors, test statistics, p-values, and significance levels (ns > 0.1, · < 0.1, \* < 0.05, \*\* < 0.01, and \*\*\* < 0.001) for the intercept and the explanatory variables *system*, the *sampling month*, *level of semi-natural habitats* (SNH), and their interactions (when significant) are provided. In the first column, the type of model (LME, linear mixed model; GLMM, generalized linear mixed model), the transformation applied on the explanatory variable (if any), and the variance structure added to the model (if any) are given.

| Response variable                                                                                                      | Explanatory variable                                                                               | Value / Estimate            | Std. error | t-value / z-value | p-value | *      |     |
|------------------------------------------------------------------------------------------------------------------------|----------------------------------------------------------------------------------------------------|-----------------------------|------------|-------------------|---------|--------|-----|
| Spider family richness<br>(LME) (varIdent(form = ~ 1   <i>Sampling month</i> ), varIdent(form = ~ 1   <i>System</i> )) | (Intercept)                                                                                        | 11.879                      | 0.469      | 25.349            | 0.000   | ***    |     |
|                                                                                                                        | <i>System</i> (Traditional)                                                                        | -1.662                      | 0.522      | -3.185            | 0.010   | *      |     |
|                                                                                                                        | <i>Sampling month</i> (May)                                                                        | 0.971                       | 0.612      | 1.587             | 0.122   | ns     |     |
|                                                                                                                        | <i>Sampling month</i> (July)                                                                       | 3.323                       | 0.749      | 4.439             | 0.000   | ***    |     |
|                                                                                                                        | <i>Sampling month</i> (September)                                                                  | 0.736                       | 0.595      | 1.236             | 0.225   | ns     |     |
| Spider abundance<br>(GLMM – negative binomial)                                                                         | (Intercept)                                                                                        | 4.219                       | 0.134      | 31.380            | <0.001  | ***    |     |
|                                                                                                                        | <i>System</i> (Traditional)                                                                        | 0.035                       | 0.188      | 0.186             | 0.852   | ns     |     |
|                                                                                                                        | <i>Sampling month</i> (May)                                                                        | 0.274                       | 0.178      | 1.539             | 0.124   | ns     |     |
|                                                                                                                        | <i>Sampling month</i> (July)                                                                       | 1.006                       | 0.157      | 6.386             | <0.001  | ***    |     |
|                                                                                                                        | <i>Sampling month</i> (September)                                                                  | 0.473                       | 0.171      | 2.760             | 0.006   | **     |     |
|                                                                                                                        | <i>System</i> (Traditional) : <i>Sampling month</i> (May)                                          | 0.207                       | 0.245      | 0.843             | 0.399   | ns     |     |
|                                                                                                                        | <i>System</i> (Traditional) : <i>Sampling month</i> (July)                                         | -0.471                      | 0.229      | -2.056            | 0.040   | *      |     |
|                                                                                                                        | <i>System</i> (Traditional) : <i>Sampling month</i> (September)                                    | -0.697                      | 0.262      | -2.665            | 0.008   | **     |     |
|                                                                                                                        | Pairwise                                                                                           |                             |            |                   |         |        |     |
|                                                                                                                        | Abandoned – Traditional, February == 0                                                             | -0.035                      | 0.188      | -0.186            | 0.853   | ns     |     |
|                                                                                                                        | Abandoned – Traditional, May == 0                                                                  | -0.242                      | 0.158      | -1.536            | 0.133   | ns     |     |
|                                                                                                                        | Abandoned – Traditional, July == 0                                                                 | 0.436                       | 0.131      | 3.327             | 0.002   | **     |     |
|                                                                                                                        | Abandoned – Traditional, September == 0                                                            | 0.662                       | 0.182      | 3.642             | <0.001  | ***    |     |
|                                                                                                                        | Parasitoid family richness<br>(LME) (Square root) (varIdent (form = ~ 1   <i>Sampling month</i> )) | (Intercept)                 | 2.853      | 0.183             | 15.572  | <0.001 | *** |
|                                                                                                                        |                                                                                                    | <i>System</i> (Traditional) | -0.024     | 0.259             | -0.093  | 0.928  | ns  |
| <i>Sampling month</i> (May)                                                                                            |                                                                                                    | 0.714                       | 0.184      | 3.877             | 0.001   | **     |     |
| <i>Sampling month</i> (July)                                                                                           |                                                                                                    | 0.681                       | 0.231      | 2.942             | 0.006   | **     |     |
| <i>Sampling month</i> (September)                                                                                      |                                                                                                    | 0.183                       | 0.249      | 0.736             | 0.468   | ns     |     |
| <i>Level of SNH</i> (Low)                                                                                              |                                                                                                    | -0.214                      | 0.080      | -2.666            | 0.029   | *      |     |
| <i>System</i> (Traditional) : <i>Sampling month</i> (May)                                                              |                                                                                                    | 0.077                       | 0.260      | 0.296             | 0.769   | ns     |     |
| <i>System</i> (Traditional) : <i>Sampling month</i> (July)                                                             |                                                                                                    | -0.369                      | 0.327      | -1.128            | 0.268   | ns     |     |
| <i>System</i> (Traditional) : <i>Sampling month</i> (September)                                                        |                                                                                                    | -0.590                      | 0.352      | -1.678            | 0.104   | ns     |     |
| <i>System</i> (Traditional) : <i>Level of SNH</i> (Low)                                                                |                                                                                                    | 0.274                       | 0.114      | 2.408             | 0.043   | *      |     |
| Pairwise                                                                                                               |                                                                                                    |                             |            |                   |         |        |     |
| Abandoned – Traditional, February == 0                                                                                 |                                                                                                    | -0.113                      | 0.253      | -0.446            | 0.667   | ns     |     |

|                                                                                   |                                                                     |         |        |         |        |     |
|-----------------------------------------------------------------------------------|---------------------------------------------------------------------|---------|--------|---------|--------|-----|
|                                                                                   | Abandoned – Traditional, May<br>== 0                                | -0.190  | 0.063  | -3.022  | 0.0165 | *   |
|                                                                                   | Abandoned – Traditional, July<br>== 0                               | 0.257   | 0.208  | 1.234   | 0.252  | ns  |
|                                                                                   | Abandoned – Traditional,<br>September == 0                          | 0.478   | 0.245  | 1.953   | 0.087  | .   |
|                                                                                   | Abandoned – Traditional,<br>High == 0                               | 0.245   | 0.118  | 2.076   | 0.072  | .   |
|                                                                                   | Abandoned – Traditional, Low<br>== 0                                | -0.029  | 0.118  | -0.247  | 0.811  | ns  |
|                                                                                   | High – Low, Abandoned == 0                                          | 0.215   | 0.081  | 2.666   | 0.029  | *   |
|                                                                                   | High – Low, Traditional == 0                                        | -0.060  | 0.081  | -0.739  | 0.481  | ns  |
| Parasitoid abundance<br>(LME) (varIdent<br>(form=~1  <i>Sampling<br/>month</i> )) | (Intercept)                                                         | 24.167  | 8.528  | 2.834   | 0.009  | **  |
|                                                                                   | <i>System</i> (Traditional)                                         | 10.333  | 9.847  | 1.049   | 0.321  | ns  |
|                                                                                   | <i>Sampling month</i> (May)                                         | 86.833  | 18.344 | 4.734   | <0.001 | *** |
|                                                                                   | <i>Sampling month</i> (July)                                        | 56.500  | 21.004 | 2.690   | 0.012  | *   |
|                                                                                   | <i>Sampling month</i> (September)                                   | 13.917  | 10.934 | 1.273   | 0.214  | ns  |
|                                                                                   | <i>Level of SNH</i> (Low)                                           | -11.667 | 9.847  | -1.185  | 0.266  | ns  |
|                                                                                   | <i>System</i> (Traditional) : <i>Sampling<br/>month</i> (May)       | 91.000  | 21.182 | 4.296   | <0.001 | *** |
|                                                                                   | <i>System</i> (Traditional) : <i>Sampling<br/>month</i> (July)      | -17.000 | 24.253 | -0.701  | 0.489  | ns  |
|                                                                                   | <i>System</i> (Traditional) : <i>Sampling<br/>month</i> (September) | -30.500 | 12.626 | -2.416  | 0.023  | *   |
|                                                                                   | <i>Sampling month</i> (May) : <i>Level of<br/>SNH</i> (Low)         | -61.333 | 21.182 | -2.896  | 0.007  | **  |
|                                                                                   | <i>Sampling month</i> (July) : <i>Level of<br/>SNH</i> (Low)        | 11.667  | 24.253 | 0.481   | 0.634  | ns  |
|                                                                                   | <i>Sampling month</i> (September) :<br><i>Level of SNH</i> (Low)    | 30.500  | 12.626 | 2.416   | 0.023  | *   |
|                                                                                   | Pairwise                                                            |         |        |         |        |     |
|                                                                                   | Abandoned – Traditional,<br>February == 0                           | -10.33  | 9.850  | -1.049  | 0.321  | ns  |
|                                                                                   | Abandoned – Traditional, May<br>== 0                                | -101.33 | 20.050 | -5.055  | <0.001 | *** |
|                                                                                   | Abandoned – Traditional, July<br>== 0                               | 6.670   | 23.27  | 0.287   | 0.781  | ns  |
|                                                                                   | Abandoned – Traditional,<br>September == 0                          | 20.170  | 10.61  | 1.900   | 0.090  | .   |
|                                                                                   | High – Low, February == 0                                           | 11.700  | 9.850  | 1.185   | 0.266  | ns  |
|                                                                                   | High – Low, May == 0                                                | 73.000  | 20.050 | 3.641   | 0.005  | **  |
|                                                                                   | High – Low, July == 0                                               | 0.000   | 23.270 | 0.000   | 1.000  | ns  |
|                                                                                   | High – Low, September == 0                                          | -18.800 | 10.61  | -1.775  | 0.110  | ns  |
| Bee genus richness<br>(LME) (Square root)                                         | (Intercept)                                                         | 1.480   | 0.130  | 11.406  | <0.001 | *** |
|                                                                                   | <i>Sampling month</i> (May)                                         | 0.506   | 0.158  | 3.205   | 0.003  | **  |
|                                                                                   | <i>Sampling month</i> (July)                                        | 0.737   | 0.158  | 4.670   | <0.001 | **  |
|                                                                                   | <i>Sampling month</i> (September)                                   | 0.007   | 0.158  | 0.043   | 0.966  | ns  |
| Bee abundance<br>(GLMM – poisson)                                                 | (Intercept)                                                         | 3.485   | 0.195  | 17.832  | <0.001 | *** |
|                                                                                   | <i>Sampling month</i> (May)                                         | -0.966  | 0.129  | -7.487  | <0.001 | *** |
|                                                                                   | <i>Sampling month</i> (July)                                        | -1.015  | 0.131  | -7.729  | <0.001 | *** |
|                                                                                   | <i>Sampling month</i> (September)                                   | -2.551  | 0.252  | -10.132 | <0.001 | *** |

|  |                                                        |        |       |        |        |     |
|--|--------------------------------------------------------|--------|-------|--------|--------|-----|
|  | <i>Level of SNH (Low)</i>                              | -1.000 | 0.291 | -3.441 | <0.001 | *** |
|  | <i>Sampling month (May) : Level of SNH (Low)</i>       | 0.783  | 0.212 | 3.699  | <0.001 | *** |
|  | <i>Sampling month (July) : Level of SNH (Low)</i>      | 0.962  | 0.209 | 4.61   | <0.001 | *** |
|  | <i>Sampling month (September) : Level of SNH (Low)</i> | 1.884  | 0.318 | 5.92   | <0.001 | *** |
|  | Pairwise                                               |        |       |        |        |     |
|  | High – Low, February == 0                              | 0.999  | 0.291 | 3.441  | 0.001  | **  |
|  | High – Low, May == 0                                   | 0.217  | 0.307 | 0.705  | 0.485  | ns  |
|  | High – Low, July == 0                                  | 0.038  | 0.305 | 0.123  | 0.903  | ns  |
|  | High – Low, September == 0                             | -0.884 | 0.388 | -2.275 | 0.029  | *   |

**Table S2.** Complete results of the different models for the richness and abundance of spiders, parasitoids, and bees. Estimates, standard errors, test statistics, p-values, and significance levels (ns > 0.1, · < 0.1, \* < 0.05, \*\* < 0.01, and \*\*\* < 0.001) for the intercept and the explanatory variables *system*, % of *semi-natural habitats* at 150m or 500m, and the interaction (when significant). In the first column, the type of model (GLS, generalized least square model; GLM, generalized linear model) and the variance structure added to the model (if any) are given.

| Response variable                                                  | Explanatory variable                                      | Value / Estimate | Std. error | t-value / z-value | p-value | *   |
|--------------------------------------------------------------------|-----------------------------------------------------------|------------------|------------|-------------------|---------|-----|
| Spider family richness (GLS) (varIdent (form=~1   <i>System</i> )) | (Intercept)                                               | 20.729           | 0.756      | 27.408            | 0.000   | *** |
|                                                                    | <i>System</i> (Traditional)                               | -3.245           | 1.170      | -2.775            | 0.022   | *   |
|                                                                    | % <i>Semi-natural 150 m</i>                               | -0.040           | 0.017      | -2.359            | 0.043   | *   |
| Spider abundance (GLM – negative binomial) (dispformula = ~system) | (Intercept)                                               | 6.280            | 0.049      | 127.120           | <0.001  | *** |
|                                                                    | <i>System</i> (Traditional)                               | -0.467           | 0.080      | -5.840            | <0.001  | *** |
|                                                                    | % <i>Semi-natural 150 m</i>                               | -0.005           | 0.001      | -3.960            | <0.001  | *** |
|                                                                    | <i>System</i> (Traditional) : % <i>Semi-natural 150 m</i> | 0.010            | 0.003      | 3.730             | <0.001  | *** |
| Parasitoid family richness (GLS)                                   | Nothing significant                                       |                  |            |                   |         |     |
| Parasitoid abundance (GLM – negative binomial)                     | (Intercept)                                               | 5.438            | 0.207      | 26.312            | <0.001  | *** |
|                                                                    | <i>System</i> (Traditional)                               | -0.030           | 0.271      | -0.111            | 0.911   | ns  |
|                                                                    | % <i>Semi-natural 500 m</i>                               | -0.002           | 0.005      | -0.346            | 0.729   | ns  |
|                                                                    | <i>System</i> (Traditional) : % <i>Semi-natural 500 m</i> | 0.011            | 0.006      | 1.829             | 0.068   | ·   |
| Bee genus richness (GLS)                                           | (Intercept)                                               | 12.073           | 0.897      | 13.461            | 0.000   | *** |
|                                                                    | <i>System</i> (Traditional)                               | -4.853           | 1.047      | -4.634            | 0.002   | **  |
|                                                                    | % <i>Semi-natural 150 m</i>                               | -0.066           | 0.020      | -3.236            | 0.012   | *   |
|                                                                    | <i>System</i> (Traditional) : % <i>Semi-natural 150 m</i> | 0.093            | 0.029      | 3.170             | 0.013   | *   |
| Bee abundance (GLS)                                                | (Intercept)                                               | 32.831           | 13.668     | 2.402             | 0.037   | *   |
|                                                                    | % <i>Semi-natural 500 m</i>                               | 0.601            | 0.319      | 1.884             | 0.089   | ·   |

**Table S3.** Complete results of the different models for the abundance of the most dominant families or genera. Estimates, standard errors, test statistics, p-values, and significance levels (ns > 0.1, · < 0.1, \* < 0.05, \*\* < 0.01, and \*\*\* < 0.001) for the intercept and the explanatory variables *system*, the *sampling month*, *level of semi-natural habitats* (SNH), and their interactions (when significant) are provided. In the first column, the type of model (LME, linear mixed model; GLMM, generalized linear mixed model), the transformation applied on the explanatory variable (if any), and the correlation or variance structure added to the model (if any) are given.

| Response variable                         | Explanatory variable                                          | Value / Estimate | Std. error | t-value / z-value | p-value | *   |
|-------------------------------------------|---------------------------------------------------------------|------------------|------------|-------------------|---------|-----|
| Araneidae abundance<br>(GLMM – poisson)   | (Intercept)                                                   | 2.291            | 0.194      | 11.806            | <0.001  | *** |
|                                           | <i>System</i> (Traditional)                                   | -0.407           | 0.178      | -2.290            | 0.022   | *   |
|                                           | <i>Sampling month</i> (May)                                   | 0.094            | 0.194      | 0.483             | 0.629   | ns  |
|                                           | <i>Sampling month</i> (July)                                  | 0.487            | 0.178      | 2.737             | 0.006   | **  |
|                                           | <i>Sampling month</i> (September)                             | -0.936           | 0.264      | -3.548            | <0.001  | *** |
|                                           | <i>Level of SNH</i> (Low)                                     | -0.430           | 0.268      | -1.603            | 0.109   | ns  |
|                                           | <i>Sampling month</i> (May) : <i>Level of SNH</i> (Low)       | 0.584            | 0.288      | 2.026             | 0.043   | *   |
|                                           | <i>Sampling month</i> (July) : <i>Level of SNH</i> (Low)      | 0.435            | 0.272      | 1.6               | 0.110   | ns  |
|                                           | <i>Sampling month</i> (September) : <i>Level of SNH</i> (Low) | 0.874            | 0.364      | 2.403             | 0.016   | *   |
|                                           | Pairwise                                                      |                  |            |                   |         |     |
|                                           | High – Low, February = 0                                      | 0.430            | 0.268      | 1.603             | 0.117   | ns  |
|                                           | High – Low, May = 0                                           | -0.155           | 0.235      | -0.658            | 0.514   | ns  |
|                                           | High – Low, July = 0                                          | -0.006           | 0.215      | -0.026            | 0.979   | ns  |
|                                           | High – Low, September = 0                                     | -0.444           | 0.323      | -1.375            | 0.177   | ns  |
| Gnaphosidae abundance<br>(GLMM – poisson) | (Intercept)                                                   | 0.978            | 0.243      | 4.025             | <0.001  | *** |
|                                           | <i>System</i> (Traditional)                                   | 0.198            | 0.253      | 0.783             | 0.434   | ns  |
|                                           | <i>Sampling month</i> (May)                                   | 1.379            | 0.189      | 7.292             | <0.001  | *** |
|                                           | <i>Sampling month</i> (July)                                  | 0.933            | 0.200      | 4.678             | <0.001  | *** |
|                                           | <i>Sampling month</i> (September)                             | 0.337            | 0.221      | 1.520             | 0.1284  | ns  |
|                                           | <i>Level of SNH</i> (Low)                                     | -0.594           | 0.279      | -2.13             | 0.033   | *   |
|                                           | <i>System</i> (Traditional) : <i>Level of SNH</i> (Low)       | 0.796            | 0.370      | 2.15              | 0.032   | *   |
|                                           | Pairwise                                                      |                  |            |                   |         |     |
|                                           | Abandoned – Traditional, High = 0                             | -0.198           | 0.253      | -0.783            | 0.4383  | ns  |
|                                           | Abandoned – Traditional, Low = 0                              | -0.994           | 0.270      | -3.678            | <0.001  | *** |
|                                           | High – Low, Abandoned = 0                                     | 0.594            | 0.279      | 2.130             | 0.039   | *   |
|                                           | High – Low, Traditional = 0                                   | -0.202           | 0.243      | -0.829            | 0.412   | ns  |
| Linyphiidae abundance<br>(GLMM – poisson) | (Intercept)                                                   | 2.094            | 0.242      | 8.653             | <0.001  | *** |
|                                           | <i>System</i> (Traditional)                                   | 0.442            | 0.268      | 1.649             | 0.099   | ·   |
|                                           | <i>Sampling month</i> (May)                                   | 0.410            | 0.221      | 1.856             | 0.063   | ·   |
|                                           | <i>Sampling month</i> (July)                                  | 0.113            | 0.231      | 0.491             | 0.624   | ns  |
|                                           | <i>Sampling month</i> (September)                             | -0.196           | 0.259      | -0.756            | 0.450   | ns  |
|                                           | <i>Level of SNH</i> (Low)                                     | -0.042           | 0.266      | -0.157            | 0.875   | ns  |
|                                           | <i>System</i> (Traditional) : <i>Sampling month</i> (May)     | 0.915            | 0.234      | 3.908             | <0.001  | *** |
|                                           | <i>System</i> (Traditional) : <i>Sampling month</i> (July)    | -0.336           | 0.240      | -1.405            | 0.160   | ns  |

|                                                   |                                                                 |        |       |        |        |     |
|---------------------------------------------------|-----------------------------------------------------------------|--------|-------|--------|--------|-----|
| Lycosidae abundance<br>(GLMM – negative binomial) | <i>System</i> (Traditional) : <i>Sampling month</i> (September) | -0.590 | 0.283 | -2.080 | 0.038  | *   |
|                                                   | <i>Sampling month</i> (May) : <i>Level of SNH</i> (Low)         | -0.595 | 0.219 | -2.714 | 0.007  | **  |
|                                                   | <i>Sampling month</i> (July) : <i>Level of SNH</i> (Low)        | 0.603  | 0.240 | 2.514  | 0.012  | *   |
|                                                   | <i>Sampling month</i> (September) : <i>Level of SNH</i> (Low)   | 0.200  | 0.282 | 0.710  | 0.478  | ns  |
|                                                   | Pairwise                                                        |        |       |        |        |     |
|                                                   | Abandoned – Traditional, February == 0                          | -0.442 | 0.268 | -1.649 | 0.108  | ns  |
|                                                   | Abandoned – Traditional, May == 0                               | -1.357 | 0.247 | -5.500 | <0.001 | *** |
|                                                   | Abandoned – Traditional, July == 0                              | -0.105 | 0.252 | -0.417 | 0.679  | ns  |
|                                                   | Abandoned – Traditional, September == 0                         | 0.148  | 0.294 | 0.503  | 0.618  | ns  |
|                                                   | High – Low, February == 0                                       | 0.042  | 0.266 | 0.157  | 0.876  | ns  |
|                                                   | High – Low, May == 0                                            | 0.6364 | 0.238 | 2.674  | 0.011  | *   |
|                                                   | High – Low, July == 0                                           | -0.562 | 0.255 | -2.204 | 0.034  | *   |
|                                                   | High – Low, September == 0                                      | -0.158 | 0.294 | -0.539 | 0.593  | ns  |
|                                                   | (Intercept)                                                     | 1.710  | 0.465 | 3.678  | <0.001 | *** |
|                                                   | <i>System</i> (Traditional)                                     | 1.537  | 0.512 | 3.001  | 0.003  | **  |
|                                                   | <i>Sampling month</i> (May)                                     | 1.013  | 0.521 | 1.945  | 0.052  | .   |
|                                                   | <i>Sampling month</i> (July)                                    | -0.536 | 0.565 | -0.948 | 0.343  | ns  |
|                                                   | <i>Sampling month</i> (September)                               | -1.169 | 0.677 | -1.726 | 0.084  | .   |
|                                                   | <i>System</i> (Traditional) : <i>Sampling month</i> (May)       | -1.378 | 0.618 | -2.230 | 0.026  | *   |
|                                                   | <i>System</i> (Traditional) : <i>Sampling month</i> (July)      | -1.198 | 0.732 | -1.637 | 0.102  | ns  |
|                                                   | <i>System</i> (Traditional) : <i>Sampling month</i> (September) | -2.720 | 1.243 | -2.189 | 0.029  | *   |
| Oxyopidae abundance<br>(GLMM – poisson)           | Pairwise                                                        |        |       |        |        |     |
|                                                   | Abandoned – Traditional, February == 0                          | -1.537 | 0.512 | -3.001 | 0.005  | **  |
|                                                   | Abandoned – Traditional, May == 0                               | -0.159 | 0.431 | -0.369 | 0.714  | ns  |
|                                                   | Abandoned – Traditional, July == 0                              | -0.339 | 0.614 | -0.553 | 0.584  | ns  |
|                                                   | Abandoned – Traditional, September == 0                         | 1.183  | 1.170 | 1.011  | 0.318  | ns  |
|                                                   | (Intercept)                                                     | 3.000  | 0.218 | 13.745 | <0.001 | *** |
|                                                   | <i>System</i> (Traditional)                                     | -1.756 | 0.312 | -5.633 | <0.001 | *** |
|                                                   | <i>Sampling month</i> (May)                                     | -1.119 | 0.227 | -4.923 | <0.001 | *** |
|                                                   | <i>Sampling month</i> (July)                                    | 1.232  | 0.139 | 8.883  | <0.001 | *** |
|                                                   | <i>Sampling month</i> (September)                               | 0.555  | 0.152 | 3.647  | 0.000  | *** |
|                                                   | <i>Level of SNH</i> (Low)                                       | -0.119 | 0.272 | -0.437 | 0.662  | ns  |
|                                                   | <i>System</i> (Traditional) : <i>Sampling month</i> (May)       | 2.076  | 0.313 | 6.630  | <0.001 | *** |
|                                                   | <i>System</i> (Traditional) : <i>Sampling month</i> (July)      | 0.851  | 0.249 | 3.415  | <0.001 | *** |

|                                                          |                                                                 |        |       |        |        |     |
|----------------------------------------------------------|-----------------------------------------------------------------|--------|-------|--------|--------|-----|
|                                                          | <i>System</i> (Traditional) : <i>Sampling month</i> (September) | 0.465  | 0.265 | 1.759  | 0.079  | .   |
|                                                          | <i>Sampling month</i> (May) : <i>Level of SNH</i> (Low)         | -0.012 | 0.274 | -0.042 | 0.966  | ns  |
|                                                          | <i>Sampling month</i> (July) : <i>Level of SNH</i> (Low)        | 0.030  | 0.190 | 0.159  | 0.874  | ns  |
|                                                          | <i>Sampling month</i> (September) : <i>Level of SNH</i> (Low)   | 0.614  | 0.201 | 3.049  | 0.002  | **  |
|                                                          | Pairwise                                                        |        |       |        |        |     |
|                                                          | Abandoned – Traditional, February == 0                          | 1.756  | 0.312 | 5.633  | <0.001 | *** |
|                                                          | Abandoned – Traditional, May == 0                               | -0.320 | 0.295 | -1.083 | 0.286  | ns  |
|                                                          | Abandoned – Traditional, July == 0                              | 0.905  | 0.226 | 4.001  | <0.001 | *** |
|                                                          | Abandoned – Traditional, September == 0                         | 1.291  | 0.242 | 5.327  | <0.001 | *** |
|                                                          | High – Low, February == 0                                       | 0.119  | 0.272 | 0.437  | 0.665  | ns  |
| Philodromidae<br>abundance<br>(GLMM – negative binomial) | High – Low, May == 0                                            | 0.130  | 0.293 | 0.445  | 0.659  | ns  |
|                                                          | High – Low, July == 0                                           | 0.089  | 0.225 | 0.394  | 0.696  | ns  |
|                                                          | High – Low, September == 0                                      | -0.495 | 0.236 | -2.099 | 0.043  | *   |
|                                                          | (Intercept)                                                     | 1.833  | 0.186 | 9.866  | <0.001 | *** |
|                                                          | <i>System</i> (Traditional)                                     | -0.254 | 0.133 | -1.909 | 0.056  | .   |
|                                                          | <i>Sampling month</i> (May)                                     | 0.029  | 0.244 | 0.118  | 0.906  | ns  |
|                                                          | <i>Sampling month</i> (July)                                    | 1.157  | 0.202 | 5.725  | <0.001 | *** |
|                                                          | <i>Sampling month</i> (September)                               | 0.669  | 0.216 | 3.101  | 0.002  | **  |
|                                                          | (Intercept)                                                     | 0.668  | 0.230 | 2.899  | 0.004  | **  |
|                                                          | <i>System</i> (Traditional)                                     | -0.344 | 0.134 | -2.565 | 0.010  | *   |
| Salcitidae<br>(GLMM – poisson)                           | <i>Sampling month</i> (May)                                     | 0.095  | 0.309 | 0.308  | 0.758  | ns  |
|                                                          | <i>Sampling month</i> (July)                                    | 2.001  | 0.238 | 8.401  | <0.001 | *** |
|                                                          | <i>Sampling month</i> (September)                               | 0.668  | 0.275 | 2.428  | 0.015  | *   |
|                                                          | (Intercept)                                                     | 1.065  | 0.325 | 3.273  | 0.001  | **  |
|                                                          | <i>System</i> (Traditional)                                     | 0.124  | 0.404 | 0.308  | 0.758  | ns  |
| Theridiidae<br>(GLMM – poisson)                          | <i>Sampling month</i> (May)                                     | -0.229 | 0.424 | -0.540 | 0.589  | ns  |
|                                                          | <i>Sampling month</i> (July)                                    | 1.168  | 0.340 | 3.438  | <0.001 | *** |
|                                                          | <i>Sampling month</i> (September)                               | 0.983  | 0.356 | 2.761  | 0.006  | **  |
|                                                          | <i>Level of SNH</i> (Low)                                       | 0.308  | 0.398 | 0.774  | 0.439  | ns  |
|                                                          | <i>System</i> (Traditional) : <i>Sampling month</i> (May)       | -0.304 | 0.448 | -0.679 | 0.497  | ns  |
|                                                          | <i>System</i> (Traditional) : <i>Sampling month</i> (July)      | -0.743 | 0.413 | -1.799 | 0.072  | .   |
|                                                          | <i>System</i> (Traditional) : <i>Sampling month</i> (September) | -1.306 | 0.490 | -2.667 | 0.008  | **  |
|                                                          | <i>Sampling month</i> (May) : <i>Level of SNH</i> (Low)         | 1.097  | 0.461 | 2.381  | 0.017  | *   |
|                                                          | <i>Sampling month</i> (July) : <i>Level of SNH</i> (Low)        | -0.214 | 0.401 | -0.535 | 0.593  | ns  |
|                                                          | <i>Sampling month</i> (September) : <i>Level of SNH</i> (Low)   | -0.627 | 0.447 | -1.402 | 0.161  | ns  |
|                                                          | <i>System</i> (Traditional) : <i>Level of SNH</i> (Low)         | -0.690 | 0.400 | -1.727 | 0.084  | .   |

|                                             |                                                                    |        |       |        |        |     |
|---------------------------------------------|--------------------------------------------------------------------|--------|-------|--------|--------|-----|
| Pairwise                                    |                                                                    |        |       |        |        |     |
|                                             | Abandoned – Traditional,<br>February == 0                          | 0.221  | 0.354 | 0.623  | 0.537  | ns  |
|                                             | Abandoned – Traditional, May<br>== 0                               | 0.525  | 0.325 | 1.615  | 0.116  | ns  |
|                                             | Abandoned – Traditional, July<br>== 0                              | 0.963  | 0.276 | 3.487  | 0.001  | **  |
|                                             | Abandoned – Traditional,<br>September == 0                         | 1.526  | 0.382 | 3.992  | <0.001 | *** |
|                                             | High – Low, February == 0                                          | 0.037  | 0.353 | 0.104  | 0.918  | ns  |
|                                             | High – Low, May == 0                                               | -1.060 | 0.346 | -3.063 | 0.004  | **  |
|                                             | High – Low, July == 0                                              | 0.251  | 0.264 | 0.952  | 0.348  | ns  |
|                                             | High – Low, September == 0                                         | 0.664  | 0.332 | 1.999  | 0.054  | .   |
|                                             | Abandoned – Traditional,<br>High == 0                              | 0.464  | 0.277 | 1.673  | 0.104  | ns  |
|                                             | Abandoned – Traditional, Low<br>== 0                               | 1.154  | 0.286 | 4.038  | <0.001 | *** |
|                                             | High – Low, Abandoned == 0                                         | -0.372 | 0.250 | -1.489 | 0.146  | ns  |
|                                             | High – Low, Traditional == 0                                       | 0.318  | 0.312 | 1.017  | 0.316  | ns  |
| Thomisidae<br>abundance                     | (Intercept)                                                        | 1.927  | 0.242 | 7.958  | <0.001 | *** |
|                                             | <i>Sampling month</i> (May)                                        | 0.516  | 0.309 | 1.671  | 0.095  | .   |
|                                             | <i>Sampling month</i> (July)                                       | -0.202 | 0.362 | -0.558 | 0.577  | ns  |
|                                             | <i>Sampling month</i> (September)                                  | -0.545 | 0.402 | -1.356 | 0.175  | ns  |
|                                             | <i>Level of SNH</i> (Low)                                          | -0.474 | 0.380 | -1.248 | 0.212  | ns  |
|                                             | <i>Sampling month</i> (May) : <i>Level of</i><br><i>SNH</i> (Low)  | -0.157 | 0.495 | -0.317 | 0.751  | ns  |
|                                             | <i>Sampling month</i> (July) : <i>Level of</i><br><i>SNH</i> (Low) | 0.766  | 0.523 | 1.464  | 0.143  | ns  |
|                                             | <i>Sampling month</i> (September) :<br><i>Level of SNH</i> (Low)   | 1.079  | 0.554 | 1.950  | 0.051  | .   |
|                                             | Pairwise                                                           |        |       |        |        |     |
|                                             | High – Low, February == 0                                          | 0.474  | 0.380 | 1.248  | 0.220  | ns  |
|                                             | High – Low, May == 0                                               | 0.631  | 0.319 | 1.976  | 0.055  | .   |
|                                             | High – Low, July == 0                                              | -0.292 | 0.360 | -0.811 | 0.422  | ns  |
|                                             | High – Low, September == 0                                         | -0.605 | 0.402 | -1.504 | 0.141  | ns  |
| Zodariidae<br>abundance<br>(GLMM – poisson) | (Intercept)                                                        | -0.263 | 0.499 | -0.527 | 0.598  | ns  |
|                                             | <i>Sampling month</i> (May)                                        | 0.981  | 0.479 | 2.049  | 0.041  | *   |
|                                             | <i>Sampling month</i> (July)                                       | 2.351  | 0.427 | 5.504  | 0.000  | *** |
|                                             | <i>Sampling month</i> (September)                                  | 2.197  | 0.430 | 5.106  | 0.000  | *** |
|                                             | <i>Level of SNH</i> (Low)                                          | -1.717 | 1.153 | -1.489 | 0.137  | ns  |
|                                             | <i>Sampling month</i> (May) : <i>Level of</i><br><i>SNH</i> (Low)  | 2.315  | 1.125 | 2.057  | 0.040  | *   |
|                                             | <i>Sampling month</i> (July) : <i>Level of</i><br><i>SNH</i> (Low) | 1.966  | 1.094 | 1.798  | 0.072  | .   |
|                                             | <i>Sampling month</i> (September) :<br><i>Level of SNH</i> (Low)   | 1.440  | 1.101 | 1.309  | 0.191  | ns  |
|                                             | Pairwise                                                           |        |       |        |        |     |
|                                             | High – Low, February == 0                                          | 1.717  | 1.153 | 1.489  | 0.145  | ns  |
|                                             | High – Low, May == 0                                               | -0.598 | 0.513 | -1.165 | 0.251  | ns  |
|                                             | High – Low, July == 0                                              | -0.249 | 0.439 | -0.567 | 0.574  | ns  |

|                                                                                   |                                                                 |        |       |        |        |     |
|-----------------------------------------------------------------------------------|-----------------------------------------------------------------|--------|-------|--------|--------|-----|
| Braconidae<br>abundance<br>(GLMM – poisson)                                       | High – Low, September == 0                                      | 0.277  | 0.456 | 0.607  | 0.547  | ns  |
|                                                                                   | (Intercept)                                                     | 1.808  | 0.256 | 7.059  | <0.001 | *** |
|                                                                                   | <i>System</i> (Traditional)                                     | -0.122 | 0.321 | -0.380 | 0.704  | ns  |
|                                                                                   | <i>Sampling month</i> (May)                                     | -0.032 | 0.293 | -0.108 | 0.914  | ns  |
|                                                                                   | <i>Sampling month</i> (July)                                    | -2.082 | 0.537 | -3.876 | <0.001 | *** |
|                                                                                   | <i>Sampling month</i> (September)                               | -1.998 | 0.628 | -3.180 | 0.001  | **  |
|                                                                                   | <i>Level of SNH</i> (Low)                                       | -0.687 | 0.332 | -2.072 | 0.038  | *   |
|                                                                                   | <i>System</i> (Traditional) : <i>Sampling month</i> (May)       | 0.964  | 0.358 | 2.695  | 0.007  | **  |
|                                                                                   | <i>System</i> (Traditional) : <i>Sampling month</i> (July)      | 0.548  | 0.539 | 1.017  | 0.309  | ns  |
|                                                                                   | <i>System</i> (Traditional) : <i>Sampling month</i> (September) | -1.802 | 1.106 | -1.630 | 0.103  | ns  |
|                                                                                   | <i>Sampling month</i> (May) : <i>Level of SNH</i> (Low)         | -0.126 | 0.374 | -0.336 | 0.737  | ns  |
|                                                                                   | <i>Sampling month</i> (July) : <i>Level of SNH</i> (Low)        | 1.538  | 0.568 | 2.709  | 0.007  | **  |
|                                                                                   | <i>Sampling month</i> (September) : <i>Level of SNH</i> (Low)   | 1.209  | 0.789 | 1.532  | 0.126  | ns  |
|                                                                                   | Pairwise                                                        |        |       |        |        |     |
|                                                                                   | Abandoned – Traditional, February == 0                          | 0.122  | 0.321 | 0.380  | 0.707  | ns  |
|                                                                                   | Abandoned – Traditional, May == 0                               | -0.842 | 0.287 | -2.931 | 0.006  | **  |
|                                                                                   | Abandoned – Traditional, July == 0                              | -0.426 | 0.487 | -0.875 | 0.388  | ns  |
|                                                                                   | Abandoned – Traditional, September == 0                         | 1.924  | 1.082 | 1.778  | 0.084  | .   |
|                                                                                   | High – Low, February == 0                                       | 0.687  | 0.332 | 2.072  | 0.046  | *   |
|                                                                                   | High – Low, May == 0                                            | 0.813  | 0.286 | 2.838  | 0.008  | **  |
|                                                                                   | High – Low, July == 0                                           | -0.851 | 0.515 | -1.653 | 0.107  | ns  |
|                                                                                   | High – Low, September == 0                                      | -0.522 | 0.754 | -0.593 | 0.493  | ns  |
| Encyrtidae<br>abundance<br>(GLMM – poisson)<br>(dispformula =<br>~sampling month) | (Intercept)                                                     | -0.508 | 0.530 | -0.959 | 0.338  | ns  |
|                                                                                   | <i>System</i> (Traditional)                                     | -0.253 | 0.802 | -0.316 | 0.752  | ns  |
|                                                                                   | <i>Sampling month</i> (May)                                     | 1.609  | 0.548 | 2.938  | 0.003  | **  |
|                                                                                   | <i>Sampling month</i> (July)                                    | 3.209  | 0.510 | 6.292  | <0.001 | *** |
|                                                                                   | <i>Sampling month</i> (September)                               | 1.910  | 0.536 | 3.564  | <0.001 | *** |
|                                                                                   | <i>System</i> (Traditional) : <i>Sampling month</i> (May)       | 0.182  | 0.830 | 0.220  | 0.826  | ns  |
|                                                                                   | <i>System</i> (Traditional) : <i>Sampling month</i> (July)      | -0.752 | 0.789 | -0.954 | 0.340  | ns  |
|                                                                                   | <i>System</i> (Traditional) : <i>Sampling month</i> (September) | -0.443 | 0.835 | -0.531 | 0.596  | ns  |
|                                                                                   | Pairwise                                                        |        |       |        |        |     |
|                                                                                   | Abandoned – Traditional, February == 0                          | 0.253  | 0.802 | 0.316  | 0.754  | ns  |
|                                                                                   | Abandoned – Traditional, May == 0                               | 0.071  | 0.407 | 0.175  | 0.862  | ns  |
|                                                                                   | Abandoned – Traditional, July == 0                              | 1.005  | 0.314 | 3.203  | 0.003  | **  |



|                                             |                                                                     |        |       |        |        |     |
|---------------------------------------------|---------------------------------------------------------------------|--------|-------|--------|--------|-----|
| Eulophidae<br>abundance<br>(GLMM – poisson) | Abandoned – Traditional,<br>September == 0                          | 0.697  | 0.417 | 1.671  | 0.103  | ns  |
|                                             | (Intercept)                                                         | 0.042  | 0.553 | 0.076  | 0.939  | ns  |
|                                             | <i>System</i> (Traditional)                                         | 0.130  | 0.652 | 0.200  | 0.842  | ns  |
|                                             | <i>Sampling month</i> (May)                                         | 2.479  | 0.537 | 4.615  | <0.001 | *** |
|                                             | <i>Sampling month</i> (July)                                        | 2.842  | 0.528 | 5.383  | <0.001 | *** |
|                                             | <i>Sampling month</i> (September)                                   | 1.980  | 0.549 | 3.604  | <0.001 | *** |
|                                             | <i>Level of SNH</i> (Low)                                           | -0.627 | 0.671 | -0.934 | 0.350  | ns  |
|                                             | <i>System</i> (Traditional) : <i>Sampling<br/>month</i> (May)       | 0.264  | 0.636 | 0.415  | 0.678  | ns  |
|                                             | <i>System</i> (Traditional) : <i>Sampling<br/>month</i> (July)      | -0.209 | 0.623 | -0.336 | 0.737  | ns  |
|                                             | <i>System</i> (Traditional) : <i>Sampling<br/>month</i> (September) | -1.370 | 0.649 | -2.111 | 0.035  | *   |
|                                             | <i>Sampling month</i> (May) : <i>Level of<br/>SNH</i> (Low)         | -0.747 | 0.666 | -1.121 | 0.262  | ns  |
|                                             | <i>Sampling month</i> (July) : <i>Level of<br/>SNH</i> (Low)        | 0.598  | 0.643 | 0.930  | 0.353  | ns  |
|                                             | <i>Sampling month</i> (September) :<br><i>Level of SNH</i> (Low)    | 1.681  | 0.665 | 2.525  | 0.012  | *   |
|                                             | Pairwise                                                            |        |       |        |        |     |
|                                             | Abandoned – Traditional,<br>February == 0                           | -0.130 | 0.652 | -0.200 | 0.843  | ns  |
|                                             | Abandoned – Traditional, May<br>== 0                                | -0.394 | 0.304 | -1.297 | 0.203  | ns  |
|                                             | Abandoned – Traditional, July<br>== 0                               | 0.079  | 0.271 | 0.292  | 0.772  | ns  |
|                                             | Abandoned – Traditional,<br>September == 0                          | 1.239  | 0.323 | 3.832  | <0.001 | *** |
|                                             | High – Low, February == 0                                           | 0.627  | 0.671 | 0.934  | 0.357  | ns  |
|                                             | High – Low, May == 0                                                | 1.374  | 0.323 | 4.252  | <0.001 | *** |
|                                             | High – Low, July == 0                                               | 0.029  | 0.272 | 0.108  | 0.945  | ns  |
|                                             | High – Low, September == 0                                          | -1.054 | 0.321 | -3.286 | 0.002  | **  |
| Mymaridae<br>abundance<br>(GLMM – poisson)  | (Intercept)                                                         | -0.049 | 0.586 | -0.084 | 0.933  | ns  |
|                                             | <i>System</i> (Traditional)                                         | 2.098  | 0.638 | 3.288  | 0.001  | **  |
|                                             | <i>Sampling month</i> (May)                                         | 2.866  | 0.518 | 5.538  | <0.001 | *** |
|                                             | <i>Sampling month</i> (July)                                        | 1.213  | 0.572 | 2.121  | 0.034  | *   |
|                                             | <i>Sampling month</i> (September)                                   | 0.419  | 0.655 | 0.639  | 0.523  | ns  |
|                                             | <i>Level of SNH</i> (Low)                                           | -1.434 | 0.528 | -2.716 | 0.007  | **  |
|                                             | <i>System</i> (Traditional) : <i>Sampling<br/>month</i> (May)       | -0.914 | 0.548 | -1.668 | 0.095  | .   |
|                                             | <i>System</i> (Traditional) : <i>Sampling<br/>month</i> (July)      | -2.567 | 0.638 | -4.021 | <0.001 | *** |
|                                             | <i>System</i> (Traditional) : <i>Sampling<br/>month</i> (September) | -3.575 | 0.791 | -4.522 | <0.001 | *** |
|                                             | <i>Sampling month</i> (May) : <i>Level of<br/>SNH</i> (Low)         | 0.677  | 0.404 | 1.677  | 0.094  | .   |
|                                             | <i>Sampling month</i> (July) : <i>Level of<br/>SNH</i> (Low)        | 1.449  | 0.527 | 2.750  | 0.006  | **  |
|                                             | <i>Sampling month</i> (September) :<br><i>Level of SNH</i> (Low)    | 2.149  | 0.657 | 3.271  | 0.001  | **  |

|                                                            |                                                                     |          |          |        |        |     |
|------------------------------------------------------------|---------------------------------------------------------------------|----------|----------|--------|--------|-----|
|                                                            |                                                                     | Pairwise |          |        |        |     |
| Abandoned – Traditional,<br>February == 0                  |                                                                     | -2.098   | 0.638    | -3.288 | 0.002  | **  |
| Abandoned – Traditional, May<br>== 0                       |                                                                     | -1.183   | 0.369    | -3.209 | 0.003  | **  |
| Abandoned – Traditional, July<br>== 0                      |                                                                     | 0.469    | 0.485    | 0.968  | 0.340  | ns  |
| Abandoned – Traditional,<br>September == 0                 |                                                                     | 1.477    | 0.668    | 2.211  | 0.034  | *   |
| High – Low, February == 0                                  |                                                                     | 1.434    | 0.528    | 2.716  | 0.010  | *   |
| High – Low, May == 0                                       |                                                                     | 0.757    | 0.369    | 2.055  | 0.047  | *   |
| High – Low, July == 0                                      |                                                                     | -0.015   | 0.482    | -0.031 | 0.976  | ns  |
| High – Low, September == 0                                 |                                                                     | -0.714   | 0.613    | -1.164 | 0.252  | ns  |
| Platygastridae<br>abundance<br>(GLMM – poisson)            | (Intercept)                                                         | -1.215   | 0.742    | -1.638 | 0.102  | ns  |
|                                                            | <i>System</i> (Traditional)                                         | 0.383    | 0.965    | 0.397  | 0.692  | ns  |
|                                                            | <i>Sampling month</i> (May)                                         | 3.277    | 0.720    | 4.550  | <0.001 | *** |
|                                                            | <i>Sampling month</i> (July)                                        | 1.705    | 0.769    | 2.218  | 0.027  | *   |
|                                                            | <i>Sampling month</i> (September)                                   | 0.000    | 1.000    | 0.000  | 1.000  | ns  |
|                                                            | <i>System</i> (Traditional) : <i>Sampling<br/>month</i> (May)       | -0.569   | 0.935    | -0.609 | 0.543  | ns  |
|                                                            | <i>System</i> (Traditional) : <i>Sampling<br/>month</i> (July)      | 1.047    | 0.972    | 1.077  | 0.282  | ns  |
|                                                            | <i>System</i> (Traditional) : <i>Sampling<br/>month</i> (September) | 2.428    | 1.167    | 2.080  | 0.038  | *   |
|                                                            | Pairwise                                                            |          |          |        |        |     |
|                                                            | Abandoned – Traditional,<br>February == 0                           | -0.383   | 0.965    | -0.397 | 0.694  | ns  |
| Pteromalidae<br>abundance<br>(GLMM – negative<br>binomial) | Abandoned – Traditional, May<br>== 0                                | 0.186    | 0.372    | 0.501  | 0.619  | ns  |
|                                                            | Abandoned – Traditional, July<br>== 0                               | -1.430   | 0.458    | -3.123 | 0.003  | **  |
|                                                            | Abandoned – Traditional,<br>September == 0                          | -2.811   | 0.792    | -3.550 | 0.001  | **  |
|                                                            | (Intercept)                                                         | 0.729    | 0.383    | 1.903  | 0.057  | .   |
|                                                            | <i>System</i> (Traditional)                                         | 0.882    | 0.235    | 3.750  | <0.001 | *** |
|                                                            | <i>Sampling month</i> (May)                                         | 1.651    | 0.380    | 4.345  | <0.001 | *** |
|                                                            | <i>Sampling month</i> (July)                                        | -0.194   | 0.507    | -0.383 | 0.701  | ns  |
|                                                            | <i>Sampling month</i> (September)                                   | -20.618  | 8643.590 | -0.002 | 0.998  | ns  |
|                                                            | <i>Level of SNH</i> (Low)                                           | -0.054   | 0.486    | -0.111 | 0.911  | ns  |
|                                                            | <i>Sampling month</i> (May) : <i>Level of<br/>SNH</i> (Low)         | -1.226   | 0.592    | -2.071 | 0.038  | *   |
|                                                            | <i>Sampling month</i> (July) : <i>Level of<br/>SNH</i> (Low)        | 0.465    | 0.688    | 0.676  | 0.499  | ns  |
|                                                            | <i>Sampling month</i> (September) :<br><i>Level of SNH</i> (Low)    | 19.282   | 8643.590 | 0.002  | 0.998  | ns  |
|                                                            | Pairwise                                                            |          |          |        |        |     |
|                                                            | High – Low, February == 0                                           | 0.054    | 0.486    | 0.111  | 0.912  | ns  |
|                                                            | High – Low, May == 0                                                | 1.280    | 0.337    | 3.795  | <0.001 | *** |
|                                                            | High – Low, July == 0                                               | -0.411   | 0.484    | -0.849 | 0.401  | ns  |
|                                                            | High – Low, September == 0                                          | -19.228  | 8643.590 | -0.002 | 0.998  | ns  |
|                                                            | (Intercept)                                                         | 1.539    | 0.279    | 5.513  | <0.001 | *** |

|                                              |                                                                 |         |           |        |        |     |
|----------------------------------------------|-----------------------------------------------------------------|---------|-----------|--------|--------|-----|
| Scelionidae<br>abundance<br>(GLMM – poisson) | <i>System</i> (Traditional)                                     | 0.799   | 0.314     | 2.546  | 0.011  | *   |
|                                              | <i>Sampling month</i> (May)                                     | 1.577   | 0.242     | 6.505  | <0.001 | *** |
|                                              | <i>Sampling month</i> (July)                                    | 1.782   | 0.239     | 7.454  | <0.001 | *** |
|                                              | <i>Sampling month</i> (September)                               | 1.272   | 0.252     | 5.056  | <0.001 | *** |
|                                              | <i>Level of SNH</i> (Low)                                       | -0.452  | 0.307     | -1.472 | 0.141  | ns  |
|                                              | <i>System</i> (Traditional) : <i>Sampling month</i> (May)       | 0.507   | 0.267     | 1.897  | 0.058  | .   |
|                                              | <i>System</i> (Traditional) : <i>Sampling month</i> (July)      | -0.701  | 0.268     | -2.616 | 0.009  | **  |
|                                              | <i>System</i> (Traditional) : <i>Sampling month</i> (September) | -1.182  | 0.288     | -4.108 | <0.001 | *** |
|                                              | <i>Sampling month</i> (May) : <i>Level of SNH</i> (Low)         | -0.348  | 0.254     | -1.369 | 0.171  | ns  |
|                                              | <i>Sampling month</i> (July) : <i>Level of SNH</i> (Low)        | 0.151   | 0.260     | 0.579  | 0.563  | ns  |
|                                              | <i>Sampling month</i> (September) : <i>Level of SNH</i> (Low)   | 0.466   | 0.280     | 1.665  | 0.096  | .   |
|                                              | Pairwise                                                        |         |           |        |        |     |
|                                              | Abandoned – Traditional, February == 0                          | -0.799  | 0.314     | -2.546 | 0.016  | *   |
|                                              | Abandoned – Traditional, May == 0                               | -1.306  | 0.227     | -5.742 | <0.001 | *** |
|                                              | Abandoned – Traditional, July == 0                              | -0.099  | 0.227     | -0.434 | 0.667  | ns  |
|                                              | Abandoned – Traditional, September == 0                         | 0.383   | 0.250     | 1.533  | 0.134  | ns  |
|                                              | High – Low, February == 0                                       | 0.452   | 0.307     | 1.472  | 0.150  | ns  |
|                                              | High – Low, May == 0                                            | 0.800   | 0.224     | 3.575  | 0.001  | **  |
|                                              | High – Low, July == 0                                           | 0.301   | 0.227     | 1.323  | 0.195  | ns  |
|                                              | High – Low, September == 0                                      | -0.014  | 0.248     | -0.057 | 0.955  | ns  |
| Andrena abundance<br>(GLMM – poisson)        | (Intercept)                                                     | 2.035   | 0.232     | 8.755  | <0.001 | *** |
|                                              | <i>System</i> (Traditional)                                     | -0.346  | 0.301     | -1.151 | 0.250  | ns  |
|                                              | <i>Sampling month</i> (May)                                     | -0.710  | 0.313     | -2.266 | 0.023  | *   |
|                                              | <i>Sampling month</i> (July)                                    | -3.333  | 1.039     | -3.209 | 0.001  | **  |
|                                              | <i>Sampling month</i> (September)                               | -22.367 | 14840.820 | -0.002 | 0.999  | ns  |
|                                              | <i>Level of SNH</i> (Low)                                       | -0.714  | 0.310     | -2.299 | 0.022  | *   |
|                                              | <i>System</i> (Traditional) : <i>Sampling month</i> (May)       | 1.036   | 0.366     | 2.830  | 0.005  | **  |
|                                              | <i>System</i> (Traditional) : <i>Sampling month</i> (July)      | -1.198  | 1.133     | -1.057 | 0.290  | ns  |
|                                              | <i>System</i> (Traditional) : <i>Sampling month</i> (September) | -1.450  | 35128.136 | 0.000  | 1.000  | ns  |
|                                              | <i>Sampling month</i> (May) : <i>Level of SNH</i> (Low)         | 0.759   | 0.369     | 2.060  | 0.039  | *   |
|                                              | <i>Sampling month</i> (July) : <i>Level of SNH</i> (Low)        | 2.267   | 1.131     | 2.005  | 0.045  | *   |
|                                              | <i>Sampling month</i> (September) : <i>Level of SNH</i> (Low)   | -0.726  | 30942.871 | 0.000  | 1.000  | ns  |
|                                              | Pairwise                                                        |         |           |        |        |     |
|                                              | Abandoned – Traditional, February == 0                          | 0.346   | 0.300     | 1.151  | 0.258  | ns  |

|                                                                                     |                                                                  |         |           |        |        |     |
|-------------------------------------------------------------------------------------|------------------------------------------------------------------|---------|-----------|--------|--------|-----|
|                                                                                     | Abandoned – Traditional, May<br>== 0                             | -0.690  | 0.290     | -2.381 | 0.023  | *   |
|                                                                                     | Abandoned – Traditional, July<br>== 0                            | 1.544   | 1.110     | 1.393  | 0.173  | ns  |
|                                                                                     | Abandoned – Traditional,<br>September == 0                       | 1.796   | 35128.14  | 0.000  | 1.000  | ns  |
|                                                                                     | High – Low, February == 0                                        | 0.714   | 0.310     | 2.299  | 0.028  | *   |
|                                                                                     | High – Low, May == 0                                             | -0.046  | 0.279     | -0.163 | 0.871  | ns  |
|                                                                                     | High – Low, July == 0                                            | -1.553  | 1.110     | -1.402 | 0.170  | ns  |
|                                                                                     | High – Low, September == 0                                       | 1.440   | 0.000     | 0.000  | 1.000  | ns  |
| Eucera abundance<br>(GLMM – poisson)                                                | (Intercept)                                                      | 2.053   | 0.562     | 3.652  | <0.001 | *** |
|                                                                                     | <i>Sampling month</i> (May)                                      | -2.833  | 0.460     | -6.157 | 0.000  | *** |
|                                                                                     | <i>Sampling month</i> (July)                                     | -23.918 | 16943.241 | -0.001 | 0.999  | ns  |
|                                                                                     | <i>Sampling month</i> (September)                                | -23.918 | 16943.241 | -0.001 | 0.999  | ns  |
|                                                                                     | <i>Level of SNH</i> (Low)                                        | -1.854  | 0.847     | -2.189 | 0.029  | *   |
|                                                                                     | <i>Sampling month</i> (May) : <i>Level of<br/>SNH</i> (Low)      | 1.889   | 0.641     | 2.949  | 0.003  | **  |
|                                                                                     | <i>Sampling month</i> (July) : <i>Level of<br/>SNH</i> (Low)     | -1.187  | 68773.714 | 0.000  | 1.000  | ns  |
|                                                                                     | <i>Sampling month</i> (September) :<br><i>Level of SNH</i> (Low) | -1.187  | 68773.714 | 0.000  | 1.000  | ns  |
|                                                                                     | Pairwise                                                         |         |           |        |        |     |
|                                                                                     | High – Low, February == 0                                        | 1.854   | 0.850     | 2.189  | 0.035  | *   |
|                                                                                     | High – Low, May == 0                                             | -0.035  | 1.000     | -0.035 | 0.973  | ns  |
|                                                                                     | High – Low, July == 0                                            | 3.041   | 68773.71  | 0.000  | 1.000  | ns  |
|                                                                                     | High – Low, September == 0                                       | 3.041   | 68773.71  | 0.000  | 1.000  | ns  |
| Lasioglossum<br>abundance<br>(GLMM – poisson)<br>(dispformula =<br>~sampling month) | (Intercept)                                                      | 2.592   | 0.231     | 11.201 | <0.001 | *** |
|                                                                                     | <i>Sampling month</i> (May)                                      | -1.144  | 0.213     | -5.363 | <0.001 | *** |
|                                                                                     | <i>Sampling month</i> (July)                                     | -0.985  | 0.201     | -4.898 | <0.001 | *** |
|                                                                                     | <i>Sampling month</i> (September)                                | -2.565  | 0.392     | -6.539 | <0.001 | *** |
|                                                                                     | <i>Level of SNH</i> (Low)                                        | -0.865  | 0.350     | -2.470 | 0.014  | *   |
|                                                                                     | <i>Sampling month</i> (May) : <i>Level of<br/>SNH</i> (Low)      | -0.415  | 0.444     | -0.935 | 0.350  | ns  |
|                                                                                     | <i>Sampling month</i> (July) : <i>Level of<br/>SNH</i> (Low)     | 0.482   | 0.332     | 1.453  | 0.146  | ns  |
|                                                                                     | <i>Sampling month</i> (September) :<br><i>Level of SNH</i> (Low) | 1.125   | 0.540     | 2.084  | 0.037  | *   |
|                                                                                     | Pairwise                                                         |         |           |        |        |     |
|                                                                                     | High – Low, February == 0                                        | 0.865   | 0.350     | 2.470  | 0.018  | *   |
|                                                                                     | High – Low, May == 0                                             | 1.279   | 0.495     | 2.586  | 0.014  | *   |
|                                                                                     | High – Low, July == 0                                            | 0.382   | 0.398     | 0.961  | 0.342  | ns  |
|                                                                                     | High – Low, September == 0                                       | -0.260  | 0.582     | -0.446 | 0.658  | ns  |

**Table S4.** Complete results of the different models for the abundance of the most dominant families or genera. Estimates, standard errors, test statistics, p-values, and significance levels (ns > 0.1, \* < 0.1, \*\* < 0.05, \*\*\* < 0.01, and \*\*\*\* < 0.001) for the intercept and the explanatory variables system, % of semi-natural habitats at 150m or 500m, and the interaction (when significant. In the first column, the type of model (GLS, generalized least square model; GLM, generalized linear model) and the variance or correlation structures added to the model (if any) are given.

| Response variable                                                                                 | Explanatory variable                        | Value / Estimate | Std. error | t-value / z-value | p-value | *   |
|---------------------------------------------------------------------------------------------------|---------------------------------------------|------------------|------------|-------------------|---------|-----|
| Araneidae abundance<br>(GLS) (correlation =<br>corGaus(form =~<br>UTMX + UTMY)                    | (Intercept)                                 | 80.175           | 10.304     | 7.781             | <0.001  | *** |
|                                                                                                   | System (Traditional)                        | -43.262          | 2.793      | -15.491           | <0.001  | *** |
|                                                                                                   | % Semi-natural 150 m                        | -0.707           | 0.080      | -8.861            | <0.001  | *** |
|                                                                                                   | System (Traditional) : % Semi-natural 150 m | 0.664            | 0.125      | 5.305             | <0.001  | *** |
| Gnaphosidae<br>abundance<br>(GLM – negative<br>binomial)<br>(dispformula =<br>~semi150)           | (Intercept)                                 | 2.158            | 0.606      | 3.562             | 0.000   | *** |
|                                                                                                   | System (Traditional)                        | 1.480            | 0.628      | 2.358             | 0.018   | *   |
|                                                                                                   | % Semi-natural 150 m                        | 0.018            | 0.012      | 1.519             | 0.129   | ns  |
|                                                                                                   | System (Traditional) : % Semi-natural 150 m | -0.028           | 0.014      | -2.052            | 0.040   | *   |
| Linyphiidae<br>abundance<br>(GLM – negative<br>binomial)<br>(dispformula = ~<br>semi150)          | (Intercept)                                 | 4.247            | 0.267      | 15.927            | <0.001  | *** |
|                                                                                                   | System (Traditional)                        | -0.143           | 0.309      | -0.463            | 0.643   | ns  |
|                                                                                                   | % Semi-natural 150 m                        | -0.015           | 0.008      | -1.905            | 0.057   | .   |
|                                                                                                   | System (Traditional) : % Semi-natural 150 m | 0.025            | 0.010      | 2.416             | 0.016   | *   |
| Lycosidae abundance<br>(GLM – negative<br>binomial)                                               | (Intercept)                                 | 3.280            | 0.331      | 9.922             | <0.001  | *** |
|                                                                                                   | System (Traditional)                        | 0.686            | 0.387      | 1.771             | 0.077   | .   |
| Oxyopidae<br>abundance<br>(GLM – poisson)<br>(gaussian correlation)                               | (Intercept)                                 | 4.957            | 0.269      | 18.416            | <0.001  | *** |
|                                                                                                   | System (Traditional)                        | -1.415           | 0.184      | -7.687            | <0.001  | *** |
|                                                                                                   | % Semi-natural 500 m                        | 0.000            | 0.005      | -0.078            | 0.938   | ns  |
|                                                                                                   | System (Traditional) : % Semi-natural 500 m | 0.010            | 0.005      | 2.124             | 0.034   | *   |
| Philodromidae<br>abundance<br>(GLM – negative<br>binomial)                                        | (Intercept)                                 | 3.867            | 0.165      | 23.421            | <0.001  | *** |
|                                                                                                   | System (Traditional)                        | -0.597           | 0.256      | -2.338            | 0.019   | *   |
|                                                                                                   | % Semi-natural 500 m                        | -0.002           | 0.004      | -0.472            | 0.637   | ns  |
|                                                                                                   | System (Traditional) : % Semi-natural 500 m | 0.010            | 0.006      | 1.672             | 0.095   | .   |
| Salticidae abundance<br>(GLM – gaussian)<br>(square root<br>transformed,<br>gaussian correlation) | (Intercept)                                 | 4.891            | 0.229      | 21.341            | <0.001  | *** |
|                                                                                                   | System (Traditional)                        | -0.883           | 0.068      | -12.937           | <0.001  | *** |
|                                                                                                   | % Semi-natural 150 m                        | -0.005           | 0.002      | -2.728            | 0.006   | **  |
|                                                                                                   | System (Traditional) : % Semi-natural 150 m | -0.008           | 0.002      | -3.188            | 0.001   | **  |
| Theridiidae<br>abundance<br>(GLM – poisson)                                                       | (Intercept)                                 | 3.435            | 0.163      | 21.059            | <0.001  | *** |
|                                                                                                   | System (Traditional)                        | -1.294           | 0.242      | -5.355            | <0.001  | *** |
|                                                                                                   | % Semi-natural 150 m                        | -0.004           | 0.004      | -1.128            | 0.259   | ns  |
|                                                                                                   | System (Traditional) : % Semi-natural 150 m | 0.020            | 0.007      | 2.852             | 0.004   | **  |
| Thomisidae<br>abundance<br>(GLM – poisson)                                                        | (Intercept)                                 | 3.602            | 0.152      | 23.723            | <0.001  | *** |
|                                                                                                   | System (Traditional)                        | -0.542           | 0.190      | -2.856            | 0.004   | **  |
|                                                                                                   | % Semi-natural 150 m                        | -0.006           | 0.004      | -1.682            | 0.093   | .   |

|                                                               |                                                    |        |       |        |        |     |
|---------------------------------------------------------------|----------------------------------------------------|--------|-------|--------|--------|-----|
|                                                               | <i>System (Traditional) : % Semi-natural 150 m</i> | 0.013  | 0.005 | 2.336  | 0.019  | *   |
| Zodariidae abundance (GLM – negative binomial)                | Nothing significant                                |        |       |        |        |     |
| Braconidae abundance (GLM – gaussian) (dispformula = ~system) | (Intercept)                                        | 4.296  | 3.761 | 1.142  | 0.253  | ns  |
|                                                               | <i>System (Traditional)</i>                        | 6.114  | 3.196 | 1.913  | 0.056  | .   |
|                                                               | <i>% Semi-natural 500 m</i>                        | 0.189  | 0.063 | 2.981  | 0.003  | **  |
| Encyrtidae abundance (GLM – poisson) (gaussian correlation)   | (Intercept)                                        | 3.954  | 0.423 | 9.344  | <0.001 | *** |
|                                                               | <i>System (Traditional)</i>                        | -1.605 | 0.240 | -6.694 | <0.001 | *** |
|                                                               | <i>% Semi-natural 150 m</i>                        | -0.021 | 0.005 | -4.237 | <0.001 | *** |
|                                                               | <i>System (Traditional) : % Semi-natural 150 m</i> | 0.020  | 0.008 | 2.599  | 0.009  | **  |
| Eulophidae abundance (GLM – gaussian) (log transformed)       | (Intercept)                                        | 4.192  | 0.323 | 12.972 | <0.001 | *** |
|                                                               | <i>System (Traditional)</i>                        | -1.019 | 0.377 | -2.701 | 0.007  | **  |
|                                                               | <i>% Semi-natural 150 m</i>                        | -0.013 | 0.007 | -1.739 | 0.082  | .   |
|                                                               | <i>System (Traditional) : % Semi-natural 150 m</i> | 0.031  | 0.011 | 2.885  | 0.004  | **  |
| Mymaridae abundance (GLM – negative binomial)                 | (Intercept)                                        | 3.201  | 0.300 | 10.674 | <0.001 | *** |
|                                                               | <i>System (Traditional)</i>                        | 0.707  | 0.356 | 1.985  | 0.047  | *   |
| Platygastridae abundance (GLS)                                | (Intercept)                                        | 24.963 | 3.737 | 6.680  | <0.001 | *** |
|                                                               | <i>% Semi-natural 150 m</i>                        | -0.308 | 0.104 | -2.973 | 0.014  | *   |
| Pteromalidae abundance (GLS)                                  | (Intercept)                                        | 9.899  | 4.448 | 2.225  | 0.057  | .   |
|                                                               | <i>System (Traditional)</i>                        | 1.490  | 6.140 | 0.243  | 0.814  | ns  |
|                                                               | <i>% Semi-natural 500 m</i>                        | 0.007  | 0.095 | 0.071  | 0.946  | ns  |
|                                                               | <i>System (Traditional) : % Semi-natural 500 m</i> | 0.524  | 0.145 | 3.609  | 0.007  | **  |
| Scelionidae abundance (GLM – negative binomial)               | (Intercept)                                        | 4.188  | 0.185 | 22.605 | <0.001 | *** |
|                                                               | <i>System (Traditional)</i>                        | 0.513  | 0.231 | 2.219  | 0.027  | *   |
| Andrena abundance (GLM – poisson) (dispformula = ~system)     | (Intercept)                                        | 2.753  | 0.239 | 11.526 | <0.001 | *** |
|                                                               | <i>System (Traditional)</i>                        | -0.359 | 0.287 | -1.250 | 0.211  | ns  |
|                                                               | <i>% Semi-natural 150 m</i>                        | -0.010 | 0.006 | -1.779 | 0.075  | .   |
|                                                               | <i>System (Traditional) : % Semi-natural 150 m</i> | 0.016  | 0.008 | 1.990  | 0.047  | *   |
| Eucera abundance (GLS)                                        | (Intercept)                                        | -1.465 | 5.743 | -0.255 | 0.804  | ns  |
|                                                               | <i>% Semi-natural 500 m</i>                        | 0.306  | 0.134 | 2.287  | 0.045  | *   |
| Lasioglossum abundance (GLS)                                  | (Intercept)                                        | 6.761  | 6.070 | 1.114  | 0.291  | ns  |
|                                                               | <i>% Semi-natural 500 m</i>                        | 0.365  | 0.142 | 2.576  | 0.028  | *   |
